# Supplementary material for: Magnetic Carbon Nanotubes for Protein Separation
Source: Hindawi journal article supplement (doi:10.1155/2012/806019), 2012-01-01
Supplement: f1 [file 806019.f1.doc]

Supporting Information

**Magnetic Carbon Nanotubes for Protein Separation**

Xiuhui Diao, Hongyu Chen, Guoliang Zhang, Fengbao Zhang, Xiaobin Fan*

**Corresponding author:* [*xiaobinfan@tju.edu.cn*](mailto:xiaobinfan@tju.edu.cn)

**Fig. S1** FTIR spectra of succinic acid acyl peroxides. FTIR spectra shows: a broad band in the 3400~3800 cm–1 region due to the carboxylic O–H stretches, peaks in the 2500~3300 cm–1 range attributed to the C–H stretching, pairs of peaks at 1860 and 1790 cm–1 assigned to the peroxide carbonyls and absorptions near 1700 cm–1 characteristic of the acid carbonyl groups

**Fig. S2** XPS spectra of magnetic *f*-CSCNTs (a) and *f*-CSCNTs–APBA (b), and the C 1s and O 1s spectra of *f*-CSCNTs–APBA. The signal of B (1s) and N (1s) indicates that APBA has been grafted onto the surfaces of *f*-CSCNTs. The O/C atomic ratio of *f*-CSCNTs increases from 0.11 to 0.19 after functionalization. For the *f*-CSCNTs–APBA, three distinct states for oxygen were observed, where the O (1s) binding energies of 531.2, 532.2 eV and 532.9 eV likely correspond to C=O, C–O oxygen and boronic acid groups, respectively.

**Fig.S3** XPS spectrum of *f*-CSCNTs–APBA–IgG. Additional evidence of the conjunction between IgG and CSCNTs was obtained by XPS. It exhibits that there is a significant increase about N element, from 1.6% to 2.7%.
